# Supplementary material for: Investigation of cyano resin-based gel polymer electrolyte: in situ gelation mechanism and electrode–electrolyte interfacial fabrication in lithium-ion battery
Source: Royal Society of Chemistry journal article supplement (doi:10.1039/c4ta04504a), 2014-01-01
Supplement: c4ta04504a1.pdf [file c4ta04504a1.pdf]

## Electronic Supplementary Information

### Investigation of cyano resin based gel polymer electrolyte: in-situ gelation mechanism and electrode/electrolyte interfacial fabrication in lithium-ion battery

Dong Zhou,<sup>a,b</sup> Yan-Bing He,<sup>a</sup> Qiang Cai,<sup>b</sup> Xianying Qin,<sup>a</sup> Baohua Li,<sup>a</sup> Hongda Du,<sup>a</sup> Quan-Hong Yang<sup>a</sup> and Feiyu Kang<sup>a,b\*</sup>

<sup>a</sup> *Engineering Laboratory for the Next Generation Power and Energy Storage Batteries, and Engineering Laboratory for Functionalized Carbon Materials, Graduate School at Shenzhen, Tsinghua University, Shenzhen 518055, China, fykang@mail.tsinghua.edu.cn*

<sup>b</sup> *Laboratory of Advanced Materials, School of Materials Science and Engineering, Tsinghua University, Beijing 100084, China*

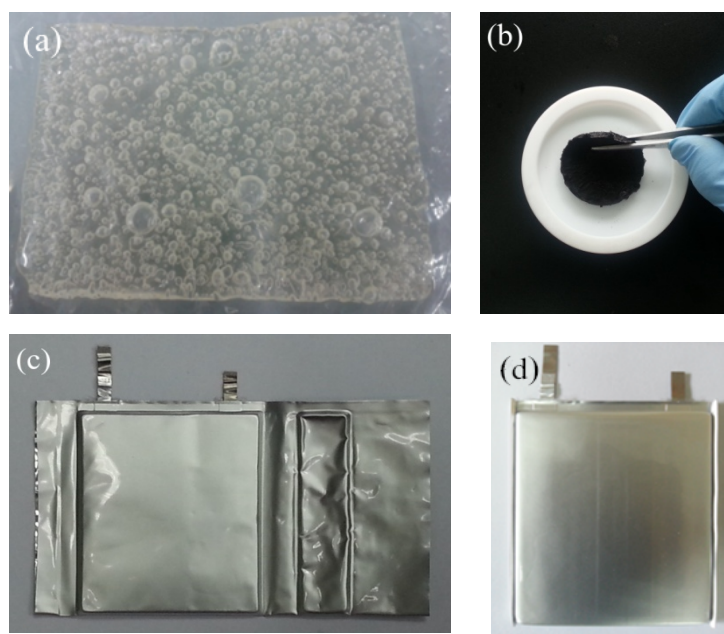

**Fig. S1** Optical images of PVA-CN sample (a), PVA-CN based GPE (b), commercial 034352 type battery before formation (c) and PVA-CN based GPE battery (d).

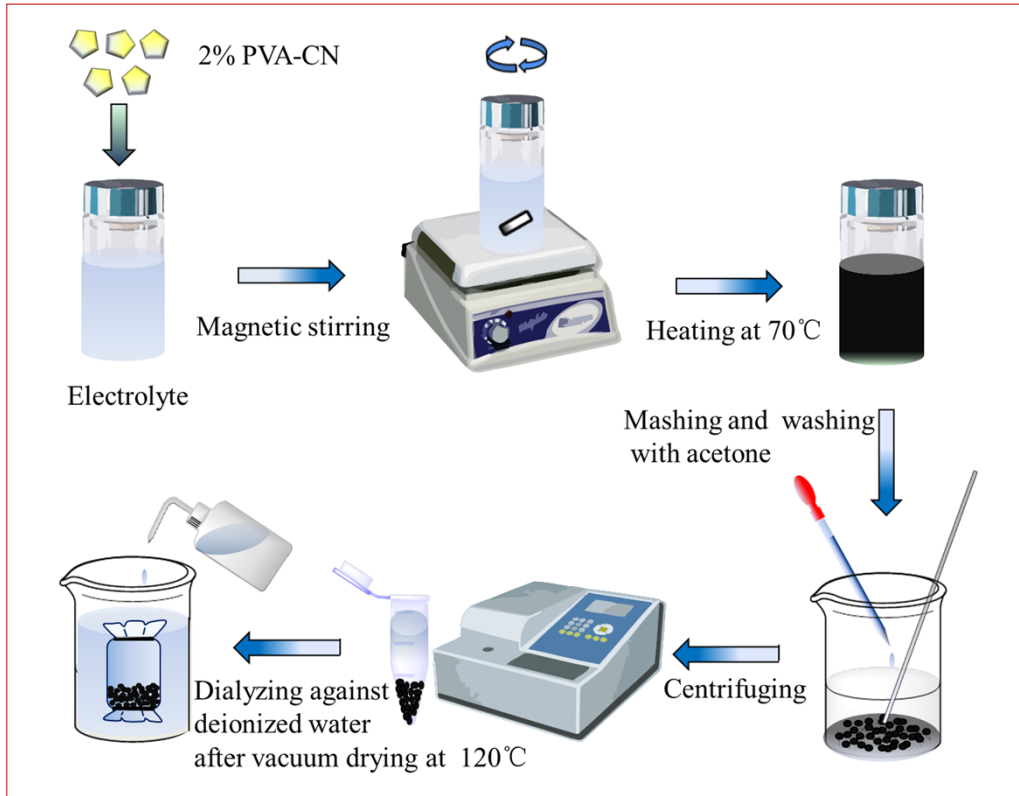

**Fig. S2** A schematic representation of the separation and purification of the polymer matrix from GPEs.

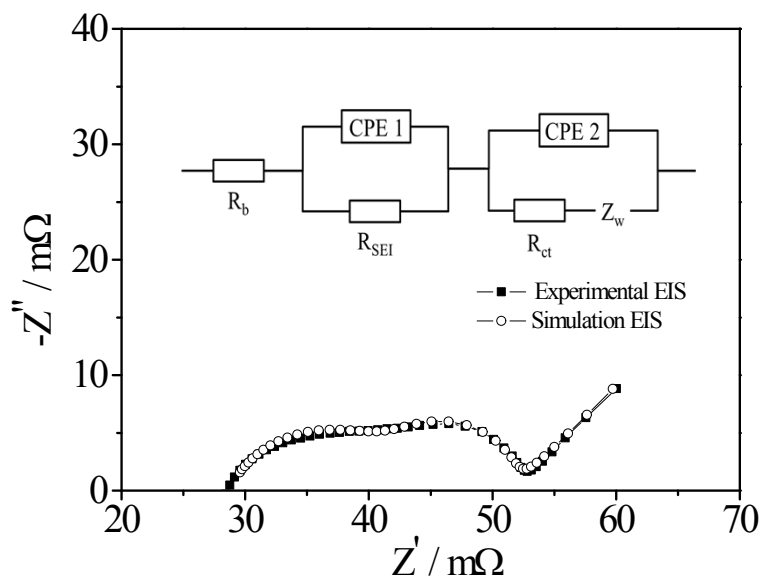

**Fig. S3** Experimental and simulation EIS curves of a polymer LIB using an equivalent circuit by Z-view software.

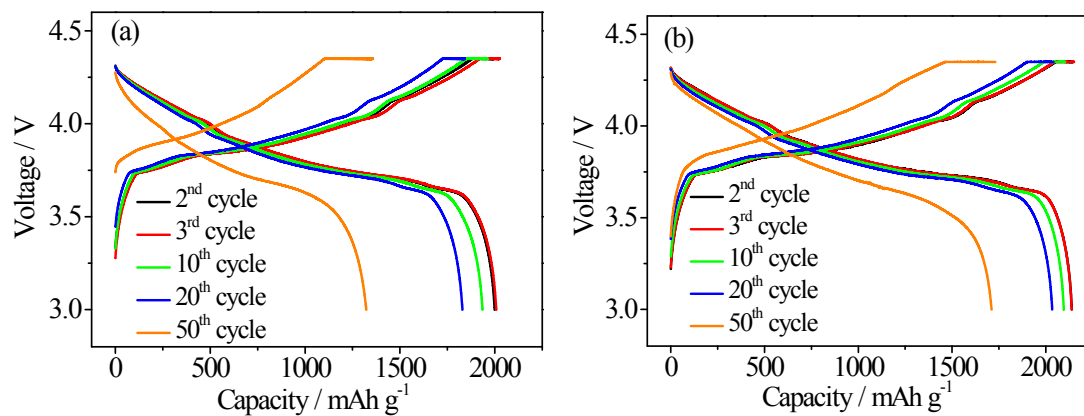

**Fig. S4** Charge and discharge curves of PVA-CN based polymer LIBs with Technology 1 (a) and Technology 2 (b) at 0.2C for some selected cycle numbers.
